# Supplementary material
Source: PubMed Central journal article supplement (PMC11428124)
Supplement: NIHMS2022605-supplement-Supplementary_Data.pdf [file NIHMS2022605-supplement-Supplementary_Data.pdf]

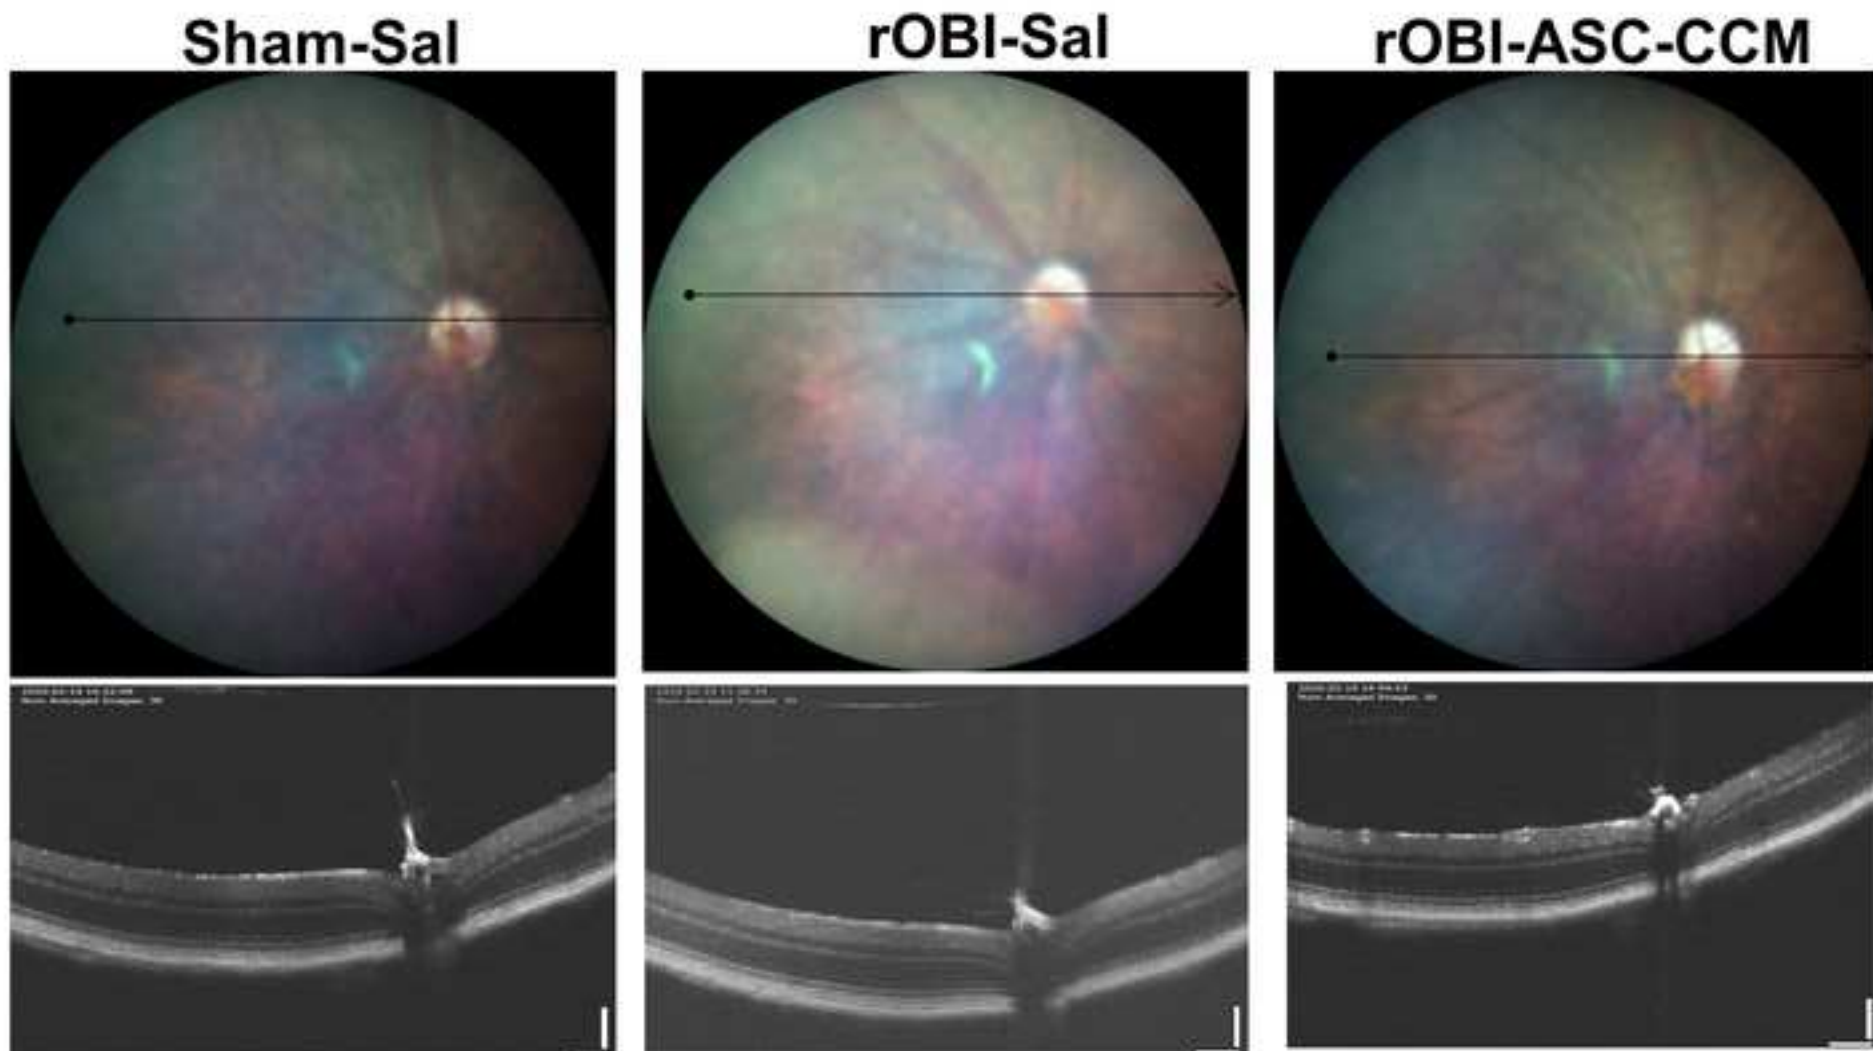

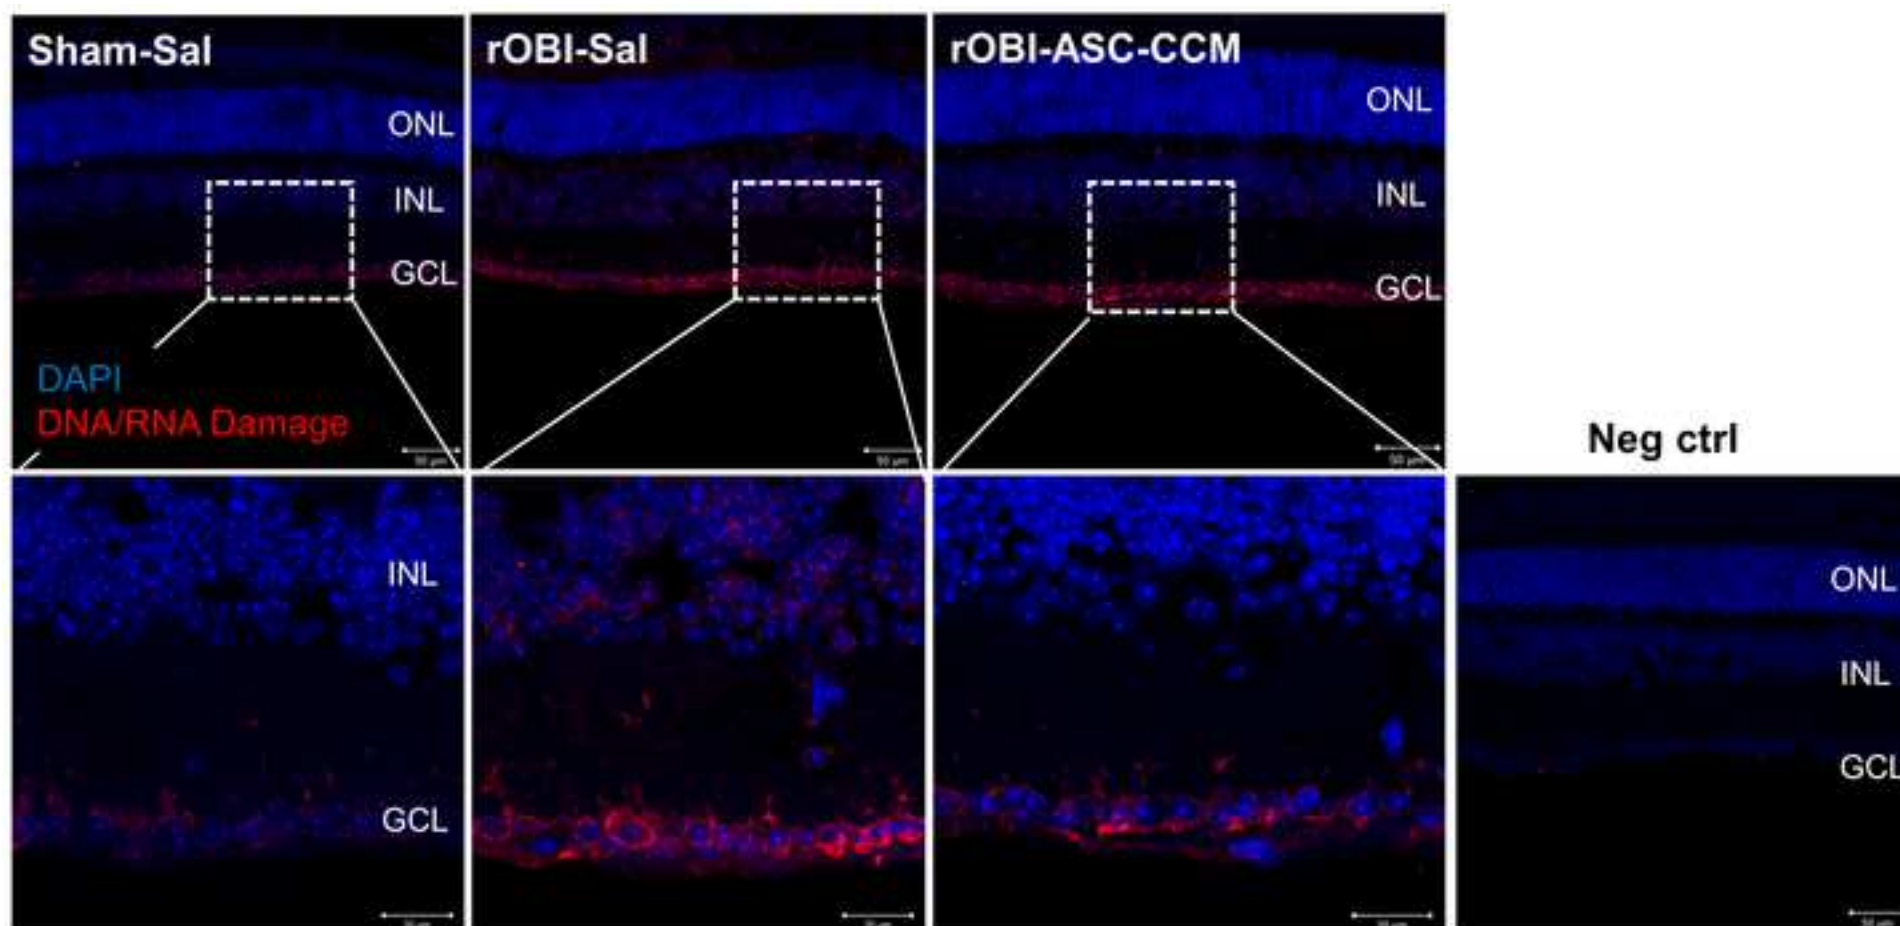

# Anti-nitrotyrosine

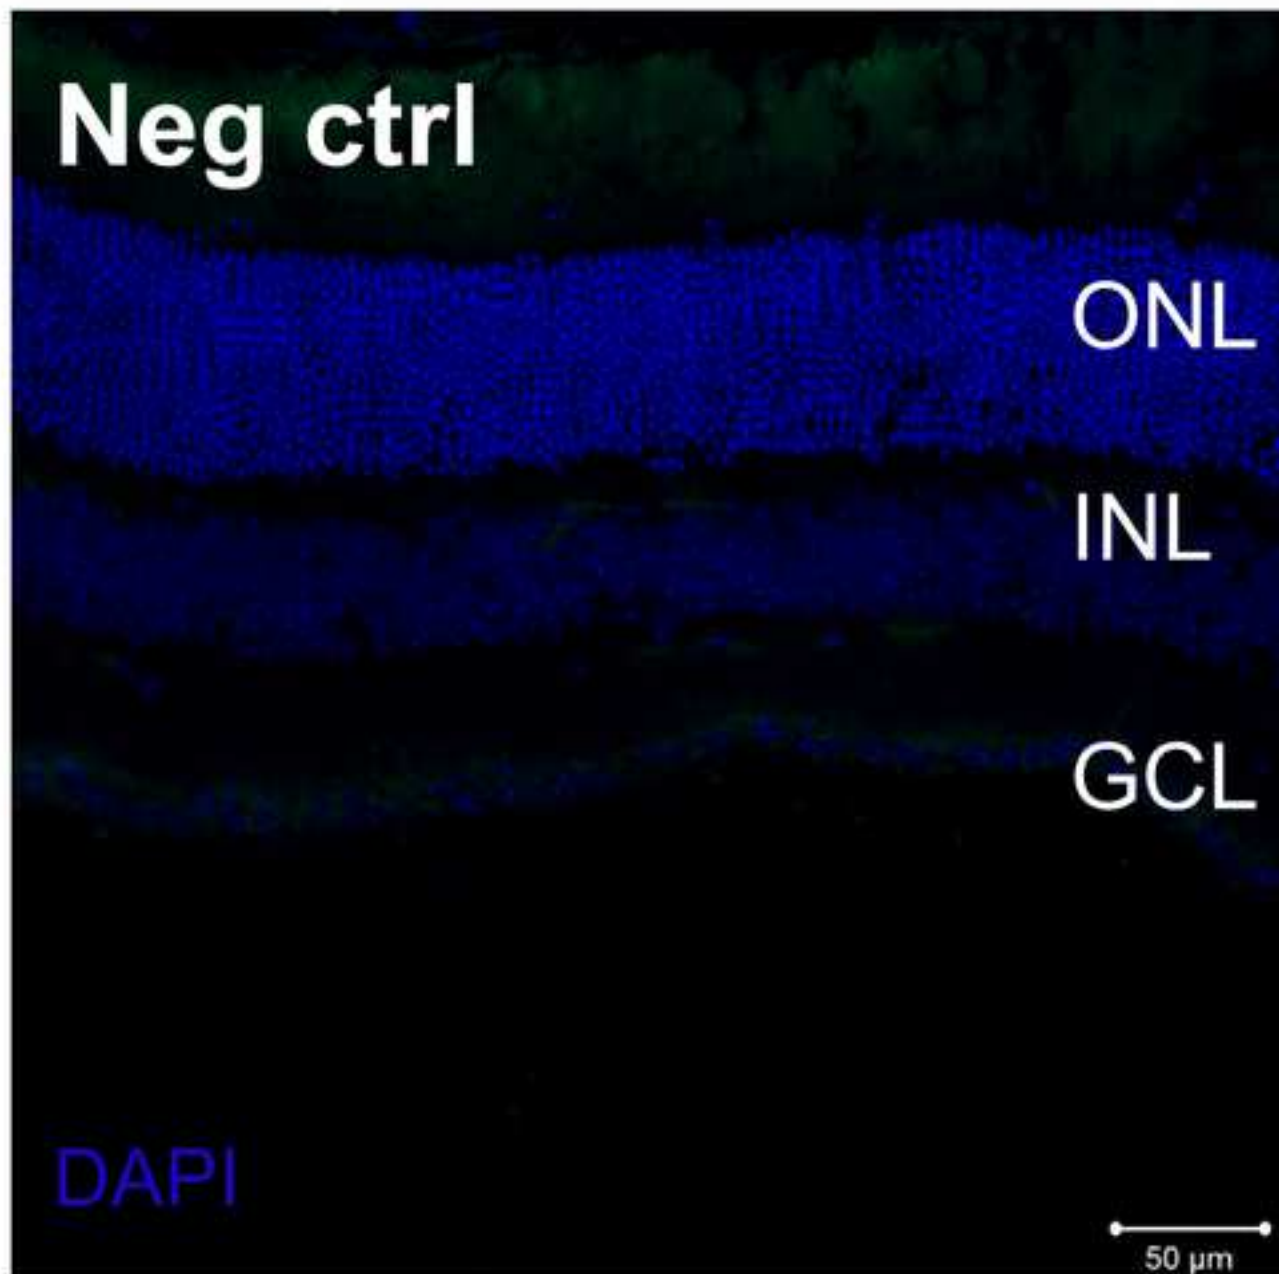

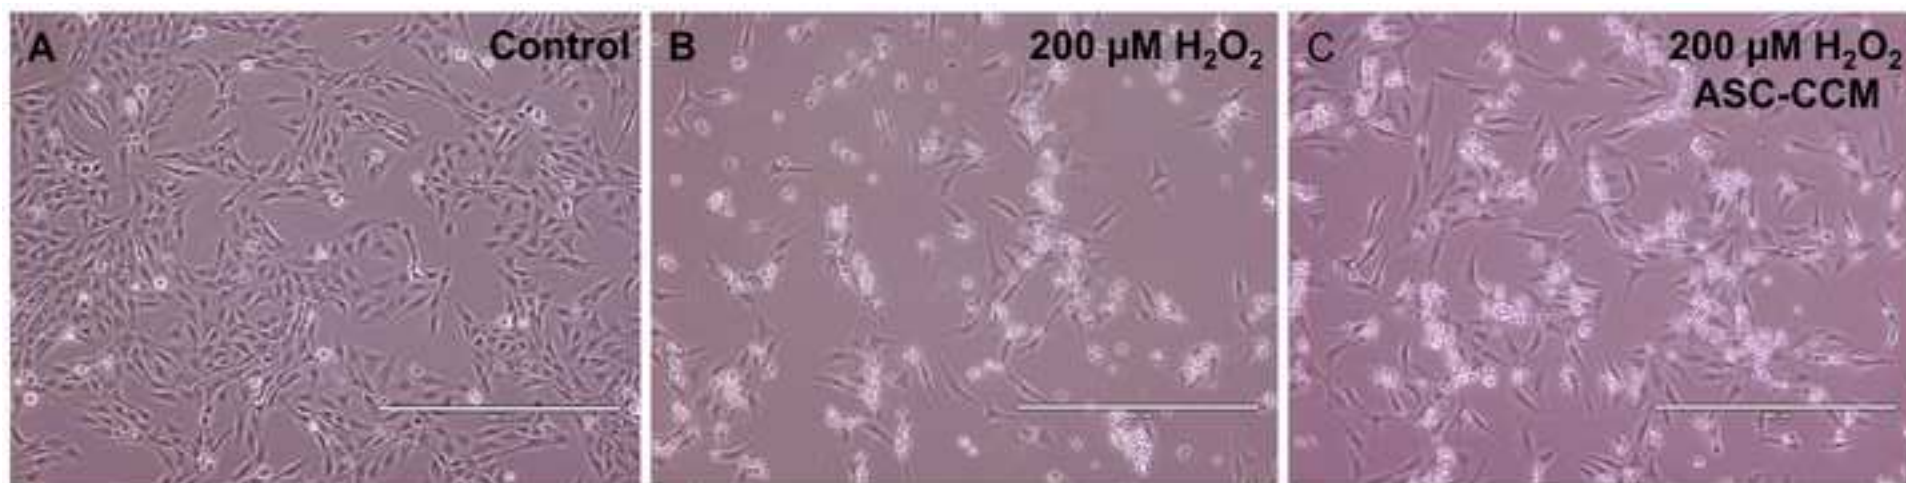

## **Supplemental Figure Legends**

**Supplemental Figure 1:** Retinal architecture using OCT in direct multiple ocular blast injury (rOBI) mice. No morphological alteration was observed in any groups. Upper panels show representative brightfield images showing b-scan location (arrow). The lower panel represents OCT images of retinal layers captured using the Phoenix MICRON Image-Guided OCT2 system. Data represent left eyes from n=8-10 animals/group.

**Supplemental Figure 2:** Immunohistological analysis of retinal tissue from all groups for DNA/RNA damage marker antibody followed by confocal microscopy in Sham mice receiving saline (Sham-Sal), rOBI mice receiving saline (rOBI-Sal), and rOBI mice receiving ASC-CCM (rOBI-ASC-CCM). Scale bar=50  $\mu\text{m}$ . Lower panel figures are from corresponding groups showing higher magnification. Scale bar = 20  $\mu\text{m}$ . A negative control (Neg Ctrl) micrograph is shown incubated with no primary antibody. Scale bar = 50  $\mu\text{m}$ .

**Supplemental Figure 3:** Immunohistological analysis of retinal tissue without the anti-nitrotyrosine antibody followed by confocal microscopy served as a negative control (Neg Ctrl). Scale bar = 50  $\mu\text{m}$ .

**Supplemental Figure 4:** Phase contrast micrographs of rMC-1 cells from control cells (A), exposed to  $\text{H}_2\text{O}_2$  (B) and pretreated with ASC-CCM and exposed to  $\text{H}_2\text{O}_2$ . Scale bar = 400  $\mu\text{m}$ .
